# Supplementary material for: Synthesis and Application of Ion-Exchange Magnetic Microspheres for Deep Removal of Trace Acetic Acid from DMAC Waste Liquid
Source: MDPI journal article supplement (doi:10.3390/nano13030509), 2023-01-27
Supplement: s1 [file s1]

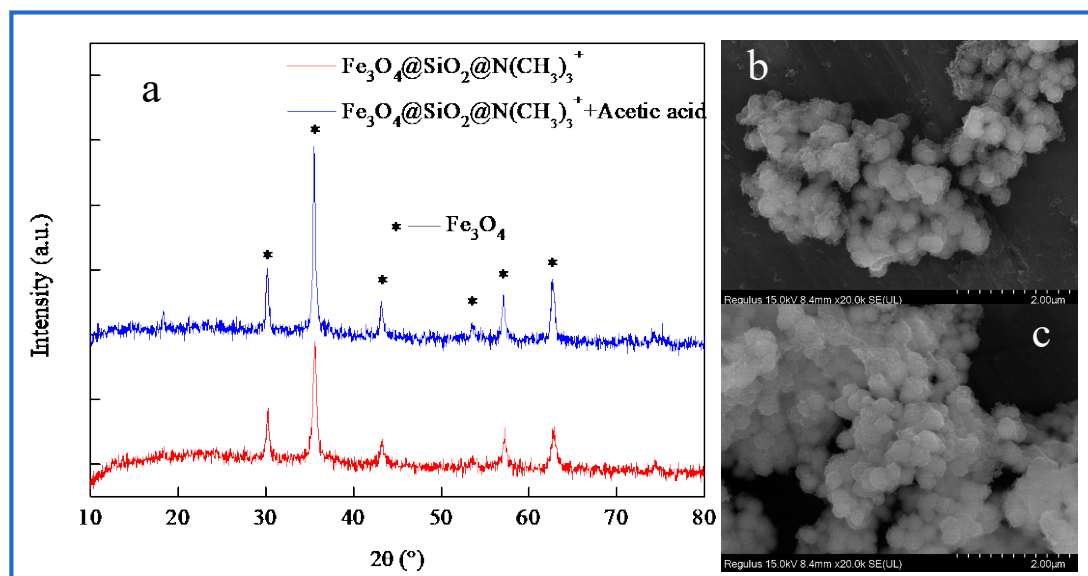

**Figure S1.** (a) FTIR spectra and SEM images of  $\text{Fe}_3\text{O}_4@\text{SiO}_2@\text{N}(\text{CH}_3)_3^+$  (b) -before, (c)-after acetic acid adsorption.
